# Supplementary material for: Altered cortical and subcortical morphometric features and asymmetries in the subjective cognitive decline and mild cognitive impairment
Source: Frontiers journal article supplement (doi:10.3389/fneur.2023.1297028), 2023-12-01
Supplement: Data_Sheet_1.PDF [file Data_Sheet_1.PDF]

## SUPPLEMENTARY MATERIAL

### Altered cortical and subcortical morphometric features and asymmetries in the subjective cognitive decline and mild cognitive impairment

#### Appendix A: the analyses to assess the results' reproducibility

We conducted some additional analysis to check the reproducibility of our results. Specifically, we randomly selected 70%, 80%, and 90% of subjects from each group (SCD, MCI, HC) and repeated the same statistical analyses as performed in the manuscript. This procedure was repeated 100 times and then we calculated the percentage of significant results ( $P < 0.05$ ).

#### Supplementary Tables

**Table S1.** Frequency of Maintained Statistical Significance in Brain Regions Across Different Sampling Percentages

|                                 | ANCOVA <sup>a</sup> | Sampling Percentage        |                            |                            |
|---------------------------------|---------------------|----------------------------|----------------------------|----------------------------|
|                                 |                     | 70%<br>ANCOVA <sup>b</sup> | 80%<br>ANCOVA <sup>b</sup> | 90%<br>ANCOVA <sup>b</sup> |
| <b>Surface area</b>             |                     |                            |                            |                            |
| Transverse Temporal Gyrus L     | P = 0.011           | 57%                        | 70%                        | 78%                        |
| Transverse Temporal Gyrus R     | P = 0.024           | 57%                        | 55%                        | 57%                        |
| <b>Thickness</b>                |                     |                            |                            |                            |
| Superior Temporal Gyrus L       | P = 0.041           | 32%                        | 48%                        | 51%                        |
| Entorhinal Cortex R             | P = 0.012           | 60%                        | 62%                        | 75%                        |
| Pars Triangularis R             | P = 0.017           | 57%                        | 56%                        | 64%                        |
| <b>Local gyrification index</b> |                     |                            |                            |                            |
| Pars Opercularis L              | P = 0.017           | 57%                        | 56%                        | 64%                        |
| Superior Temporal Gyrus L       | P = 0.035           | 45%                        | 53%                        | 53%                        |
| Transverse Temporal Gyrus L     | P = 0.002           | 77%                        | 80%                        | 90%                        |
| Insula L                        | P = 0.031           | 55%                        | 55%                        | 68%                        |
| Bankssts R                      | P = 0.031           | 51%                        | 55%                        | 60%                        |
| <b>Hippocampus</b>              |                     |                            |                            |                            |
| Fimbria L                       | P = 0.024           | 45%                        | 59%                        | 59%                        |
| Fimbria R                       | P = 0.029           | 41%                        | 52%                        | 49%                        |
| <b>Hypothalamus</b>             |                     |                            |                            |                            |
| Tubular-Superior L              | P = 0.014           | 57%                        | 54%                        | 70%                        |
| Hypothalamus L                  | P = 0.023           | 49%                        | 54%                        | 57%                        |
| Anterior-Superior R             | P = 0.012           | 55%                        | 63%                        | 64%                        |
| <b>Thalamus</b>                 |                     |                            |                            |                            |
| Anterior L                      | P = 0.019           | 50%                        | 56%                        | 68%                        |
| <b>Surface area asymmetry</b>   |                     |                            |                            |                            |

|                            |           |     |     |     |
|----------------------------|-----------|-----|-----|-----|
| Pars Orbitalis             | P = 0.033 | 45% | 37% | 52% |
| Precuneus                  | P = 0.009 | 56% | 66% | 71% |
| <b>Thickness asymmetry</b> |           |     |     |     |
| Superior Temporal Gyrus    | P = 0.011 | 63% | 63% | 71% |
| Insula                     | P = 0.014 | 60% | 63% | 68% |

a: the results of ANCOVA analysis using the original sample groups.

b: the results of ANCOVA analysis using the randomly selected sample groups, which was calculated as the percentage of significant results. R, right; L, left.
